# Supplementary material for: Synthesis of highly monodisperse porous manganese oxide spheres using a butyric acid microemulsion
Source: Royal Society of Chemistry journal article supplement (doi:10.1039/c4cc06634k), 2014-12-15

## Supplemental Material

### S1. Synthesis of Manganese Oxide Porous Spheres

Reagent grade chemicals were obtained from Fisher Scientific Company and used as received.

In a typical synthesis, a 20 mM solution of  $\text{KMnO}_4$  was prepared by dissolving 0.158 g (1 mmol) of  $\text{KMnO}_4$  in 25 mL of distilled water. A second solution was prepared with 1.1 mL n-butanol and 2.3 mL butyric acid dissolved in 25 mL of distilled water. The permanganate solution was added to the n-butanol/butyric acid solution and the resulting reaction mixture was stirred vigorously for 20 minutes. The resulting brown precipitate was isolated by vacuum filtration through a medium porosity glass frit, washed three times with distilled water and dried at 110 °C.

### S2. Powder XRD pattern of porous manganese oxide spheres (amorphous)

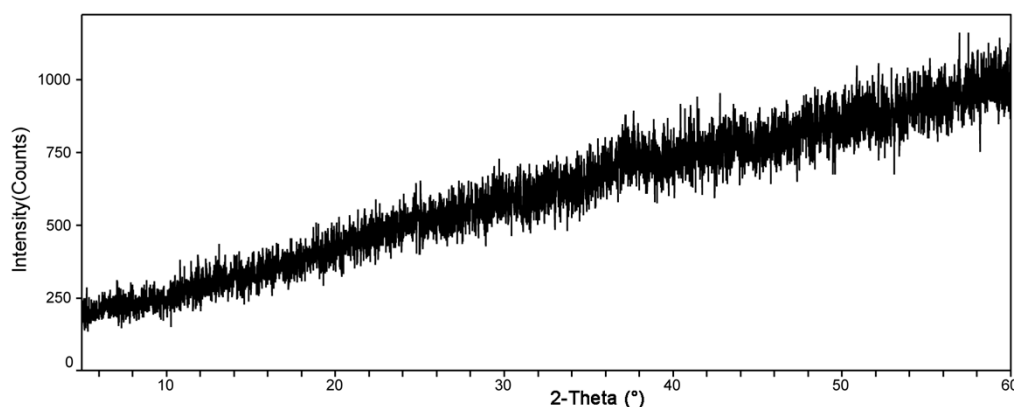

### S3. Nitrogen adsorption/desorption isotherm for porous manganese oxide spheres

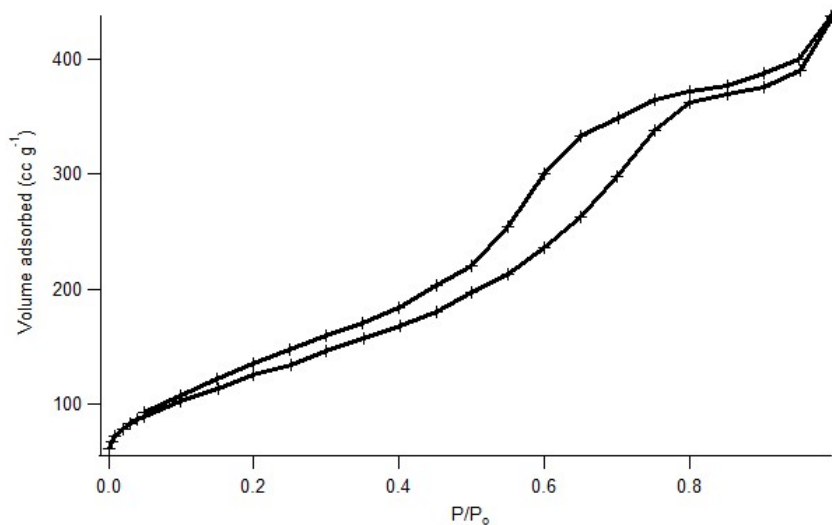

S4. BJH pore size distribution for porous manganese oxide spheres, showing three distinct pore size distributions in the meso-range. The major distribution is at 4.88 nm, followed by 3.83 nm and 2.18 nm.

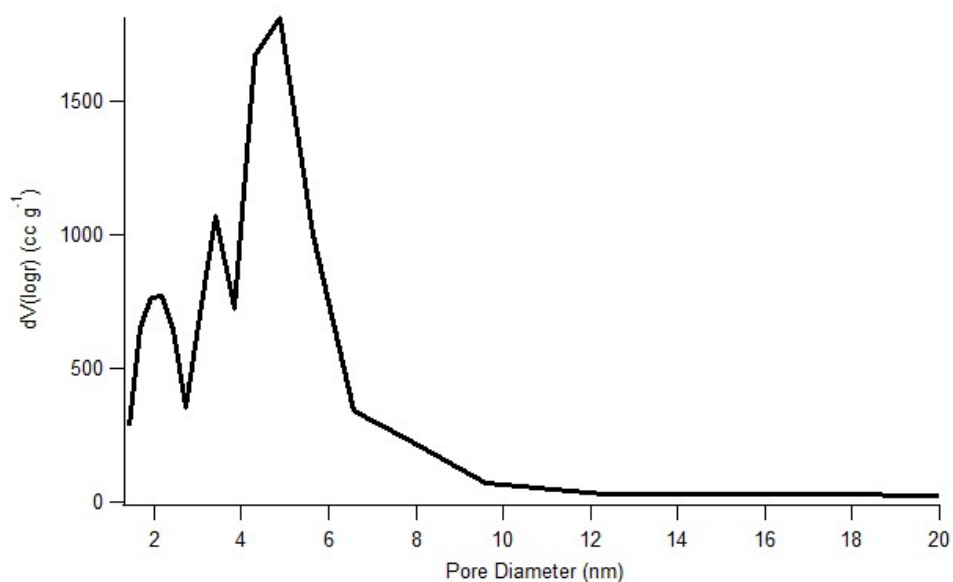

S5. Listing of surface areas for manganese oxide porous spheres with different diameters.

| <u>[KMnO<sub>4</sub>] (mM)</u> | <u>Sphere Diameter (nm)</u> | <u>BET Surface Area (m<sup>2</sup>/g)</u> |
|--------------------------------|-----------------------------|-------------------------------------------|
| 8                              | 267                         | 253                                       |
| 12                             | 303                         | 256                                       |
| 16                             | 336                         | 217                                       |
| 20                             | 379                         | 243                                       |
| 24                             | 410                         | 176                                       |
| 30                             | 497                         | 217                                       |
| 40                             | 633                         | 204                                       |

S6. SEM images of different sized manganese oxide porous spheres prepared using the procedure in S1, but with different concentrations of  $\text{KMnO}_4$ . In all images, the magnification is 40,000x and the scale bar represents 1 micron.  $[\text{KMnO}_4]$ : (A) 8 mM, (B) 12 mM, (C) 16 mM, (D) 20 mM, (E) 24 mM, (F) 30 mM, (G) 40 mM, (H) 60 mM.

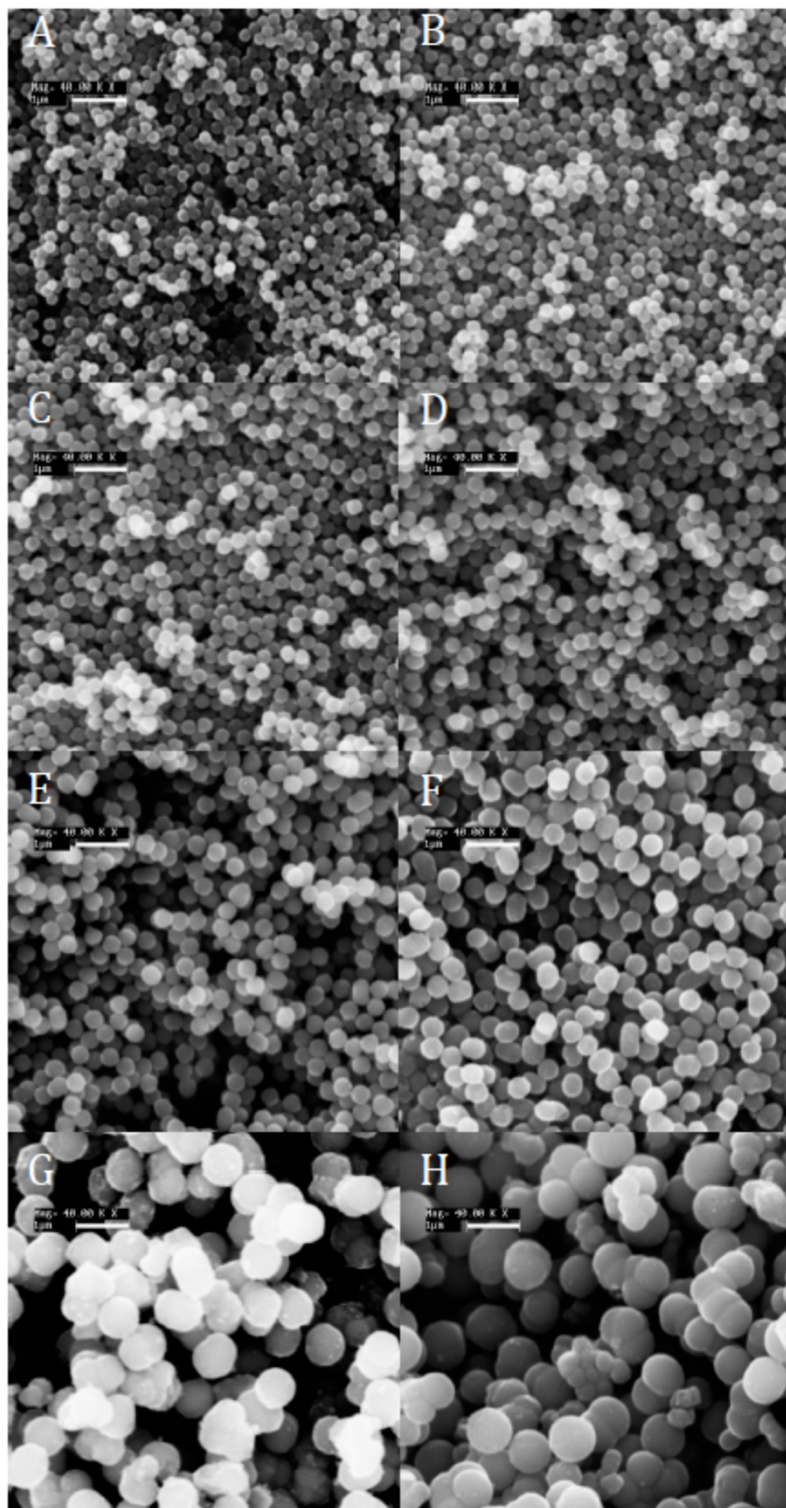

S7. SEM images of manganese oxide formed at different dwell times. (A) 4 minutes. (B) 8 minutes. Total reaction time in S1 is 20 minutes.

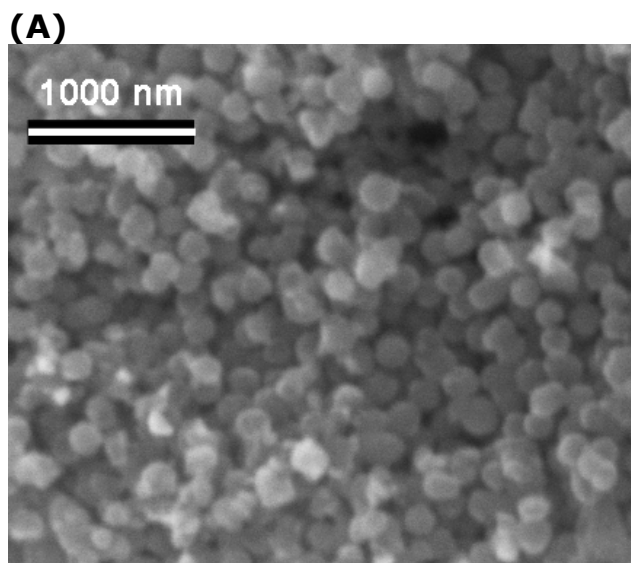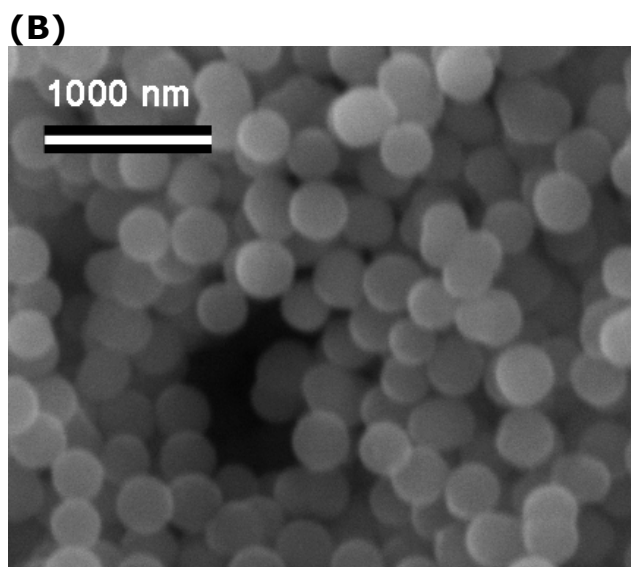

Supplement: c4cc06634k1.pdf [file c4cc06634k1.pdf]
